# Supplementary material for: Vitamin D Supplementation and Prior Oral Poliovirus Vaccination Decrease Odds of COVID-19 Outcomes among Adults Recently Inoculated with Inactivated Poliovirus Vaccine
Source: MDPI journal article supplement (doi:10.3390/vaccines12020121), 2024-01-24
Supplement: s1 [file s1]

*Supplementary Material*

11. Supplementary Figures and Tables

11.1 Supplementary Table S1. Participant Demographics and Characteristics

| Characteristic          | Frequency (%)<br>(N = 282) | Characteristic                | Frequency (%)<br>(N = 282) |
|-------------------------|----------------------------|-------------------------------|----------------------------|
| Age (years)             |                            | Underlying Medical Conditions |                            |
| Mean                    | 51.4                       | Yes                           | 135 (47.9)                 |
| Median                  | 55.0                       | No                            | 147 (52.1)                 |
| Range                   | 18-80                      | Hypertension                  |                            |
| Age (years by category) |                            | Yes                           | 91 (32.3)                  |
| 18-50                   | 123 (43.6)                 | No                            | 191 (67.7)                 |
| 51-64                   | 86 (30.5)                  | Diabetes                      |                            |
| 65-80                   | 73 (25.9)                  | Yes                           | 58 (20.6)                  |
| Biological Sex          |                            | No                            | 224 (79.4)                 |
| Male                    | 130 (46.1)                 | Dyslipidemia                  |                            |
| Female                  | 152 (53.9)                 | Yes                           | 51 (18.1)                  |
| Race/Ethnicity          |                            | No                            | 231 (81.9)                 |

|                                                      |            |                                                     |            |
|------------------------------------------------------|------------|-----------------------------------------------------|------------|
| <i>White</i>                                         | 173 (61.3) | <b>Received COVID-19 Vaccine</b>                    |            |
| <i>Hispanic/Latinx</i>                               | 67 (23.8)  | <i>Yes</i>                                          | 150 (53.2) |
| <i>Asian</i>                                         | 26 (9.2)   | <i>No</i>                                           | 132 (46.8) |
| <i>Other</i>                                         | 16 (5.7)   | <b>Vitamin D Supplementation</b>                    |            |
| <b>Employment Status</b>                             |            | <i>Yes</i>                                          | 100 (35.5) |
| <i>Full-Time</i>                                     | 121 (42.9) | <i>No</i>                                           | 182 (64.5) |
| <i>Part-Time</i>                                     | 44 (15.6)  | <b>Previously Received Oral Polio Vaccine (OPV)</b> |            |
| <i>Not Employed</i>                                  | 117 (41.5) | <i>Yes</i>                                          | 207 (73.4) |
| <b>Education Completed</b>                           |            | <i>No</i>                                           | 75 (26.6)  |
| <i>Graduate Degree</i>                               | 50 (17.7)  | <b>Tested Positive for SARS-CoV-2</b>               |            |
| <i>Bachelor or Associate</i>                         | 106 (37.6) | <i>Yes</i>                                          | 99 (35.1)  |
| <i>High School or Less</i>                           | 126 (44.7) | <i>No</i>                                           | 183 (64.9) |
| <b>Exposed to Omicron or Delta SARS-CoV-2 Strain</b> |            | <b>Experienced COVID-19 Symptoms</b>                |            |
| <i>Omicron</i>                                       | 160 (56.7) | <i>Yes</i>                                          | 111 (39.4) |
| <i>Delta</i>                                         | 122 (43.3) | <i>No</i>                                           | 171 (60.6) |

| Health Insurance    |            | Duration of COVID-19 Symptoms |                                   |
|---------------------|------------|-------------------------------|-----------------------------------|
| <i>Private</i>      | 157 (55.7) | <i>Mean</i>                   | 10.3 days                         |
| <i>Medicare</i>     | 70 (24.8)  | <i>Median</i>                 | 7.0 days                          |
| <i>Medicaid</i>     | 31 (11.0)  | <i>Range</i>                  | 1 day - 120 days <sup>(N=1)</sup> |
| <i>No Insurance</i> | 24 (8.5)   |                               |                                   |

## 11.2 Supplementary Table S2. Main Effects of Predictor Variables

| Indep.<br>Variable             | Tested Positive for<br>SARS-CoV-2 (Yes/No) |             |             | Experienced COVID-19<br>Symptoms (Yes/No) |             |             | Days Experienced COVID-19 Symptoms |              |         |
|--------------------------------|--------------------------------------------|-------------|-------------|-------------------------------------------|-------------|-------------|------------------------------------|--------------|---------|
|                                | Odds<br>Ratio<br>(Unadj)                   | 95%<br>CI   | p-<br>Value | Odds<br>Ratio<br>(Unadj)                  | 95%<br>CI   | p-<br>Value | $\beta$<br>Coefficient             | 95%<br>CI    | p-Value |
| <b>Age (years by category)</b> |                                            |             |             |                                           |             |             |                                    |              |         |
| <i>18-50</i>                   | 1.0                                        | ---         | ---         | 1.0                                       | ---         | ---         | ---                                | ---          | ---     |
| <i>51-64</i>                   | 0.93                                       | 0.52 – 1.65 | 0.801       | 0.74                                      | 0.42 – 1.31 | 0.307       | -0.93                              | -3.66 – 1.80 | 0.502   |
| <i>65-80</i>                   | 0.85                                       | 0.46 – 1.56 | 0.599       | 0.78                                      | 0.43 – 1.40 | 0.401       | 0.89                               | -1.98 – 3.76 | 0.541   |
| <b>Biological Sex</b>          |                                            |             |             |                                           |             |             |                                    |              |         |
| <i>Female</i>                  | 1.0                                        | ---         | ---         | 1.0                                       | ---         | ---         | ---                                | ---          | ---     |

# Supplementary Material

|                                |             |                    |                 |             |                    |                 |       |              |       |
|--------------------------------|-------------|--------------------|-----------------|-------------|--------------------|-----------------|-------|--------------|-------|
| <i>Male</i>                    | 1.16        | 0.71 – 1.89        | 0.555           | 1.05        | 0.65 – 1.70        | 0.839           | -0.16 | -2.48 – 2.1  | 0.894 |
| <b>Race/Ethnicity</b>          |             |                    |                 |             |                    |                 |       |              |       |
| <i>white</i>                   | 1.0         | ---                | ---             | 1.0         | ---                | ---             | ---   | ---          | ---   |
| <i>Hispanic/<br/>Latinx</i>    | 0.86        | 0.48 – 1.54        | 0.618           | 0.88        | 0.49 – 1.56        | 0.668           | -1.25 | -4.04 – 1.53 | 0.376 |
| <i>Asian</i>                   | <b>0.13</b> | <b>0.02 – 0.45</b> | <b>&lt;0.01</b> | <b>0.31</b> | <b>0.10 – 0.80</b> | <b>&lt;0.05</b> | -3.83 | -7.90 – 0.24 | 0.065 |
| <i>Other</i>                   | 0.7         | 0.21 – 2.02        | 0.528           | 0.44        | 0.12 – 1.31        | 0.164           | -3.23 | -8.29 – 1.83 | 0.21  |
| <b>Health Insurance</b>        |             |                    |                 |             |                    |                 |       |              |       |
| <i>Private</i>                 | 1.0         | ---                | ---             | 1.0         | ---                | ---             | ---   | ---          | ---   |
| <i>Medicaid</i>                | 0.64        | 0.27 – 1.45        | 0.304           | 0.74        | 0.32 – 1.62        | 0.459           | 0.73  | -3.09 – 4.56 | 0.707 |
| <i>Medicare</i>                | 0.72        | 0.39 – 1.30        | 0.284           | 0.75        | 0.41 – 1.33        | 0.325           | 1.76  | -1.04 – 4.56 | 0.216 |
| <i>No<br/>Insurance</i>        | 0.65        | 0.24 – 1.60        | 0.364           | 0.67        | 0.26 – 1.62        | 0.389           | -0.02 | -4.29 – 4.24 | 0.992 |
| <b>Education Completed</b>     |             |                    |                 |             |                    |                 |       |              |       |
| <i>Bachelor/<br/>Associate</i> | 1.0         | ---                | ---             | 1.0         | ---                | ---             | ---   | ---          | ---   |
| <i>Graduate<br/>Degree</i>     | 0.62        | 0.29 – 1.26        | 0.195           | 0.8         | 0.40 – 1.58        | 0.524           | -1.11 | -4.44 – 2.23 | 0.515 |

|                            |      |             |       |      |             |       |       |              |       |
|----------------------------|------|-------------|-------|------|-------------|-------|-------|--------------|-------|
| <i>High School or Less</i> | 0.85 | 0.50 – 1.45 | 0.554 | 0.75 | 0.44 – 1.27 | 0.286 | -1.42 | -3.98 – 1.14 | 0.276 |
| <b>Employment Status</b>   |      |             |       |      |             |       |       |              |       |
| <i>Full-Time</i>           | 1.0  | ---         | ---   | 1.0  | ---         | ---   | ---   | ---          | ---   |
| <i>Not Employed</i>        | 0.51 | 0.30 – 0.87 | <0.01 | 0.55 | 0.32 – 0.92 | <0.05 | 0     | -2.52 – 2.52 | 1     |
| <i>Part-Time</i>           | 0.41 | 0.18 – 0.87 | <0.05 | 0.39 | 0.18 – 0.82 | <0.05 | -0.72 | -4.15 – 2.71 | 0.679 |

| Indep. Variable                      | Tested Positive for SARS-CoV-2 (Yes/No) |             |         | Experienced COVID-19 Symptoms (Yes/No) |             |         | Days Experienced COVID-19 Symptoms |              |         |
|--------------------------------------|-----------------------------------------|-------------|---------|----------------------------------------|-------------|---------|------------------------------------|--------------|---------|
|                                      | Odds Ratio (Unadj)                      | 95% CI      | p-Value | Odds Ratio (Unadj)                     | 95% CI      | p-Value | $\beta$ Coefficient                | 95% CI       | p-Value |
| <b>Underlying Medical Conditions</b> |                                         |             |         |                                        |             |         |                                    |              |         |
| <i>No</i>                            | 1.0                                     | ---         | ---     | 1.0                                    | ---         | ---     | ---                                | ---          | ---     |
| <i>Yes</i>                           | 3.3                                     | 1.99 – 5.57 | <0.001  | 5.07                                   | 3.04 – 8.62 | <0.001  | 1.7                                | -0.61 – 4.01 | 0.148   |
| <b>Diabetes</b>                      |                                         |             |         |                                        |             |         |                                    |              |         |
| <i>No</i>                            | 1.0                                     | ---         | ---     | 1.0                                    | ---         | ---     | ---                                | ---          | ---     |
| <i>Yes</i>                           | 2.88                                    | 1.60 – 5.25 | <0.001  | 3.93                                   | 2.16 – 7.34 | <0.001  | 0.99                               | -1.88 – 3.85 | 0.498   |

Supplementary Material

|                                               |             |                    |                  |             |                    |                  |              |                      |                  |
|-----------------------------------------------|-------------|--------------------|------------------|-------------|--------------------|------------------|--------------|----------------------|------------------|
| <b>Hypertension</b>                           |             |                    |                  |             |                    |                  |              |                      |                  |
| <i>No</i>                                     | 1.0         | ---                | ---              | 1.0         | ---                | ---              | ---          | ---                  | ---              |
| <i>Yes</i>                                    | <b>2.66</b> | <b>1.59 – 4.49</b> | <b>&lt;0.001</b> | <b>3.96</b> | <b>2.35 – 6.75</b> | <b>&lt;0.001</b> | <b>2.71</b>  | <b>0.25 – 5.16</b>   | <b>&lt;0.05</b>  |
| <b>Dyslipidemia</b>                           |             |                    |                  |             |                    |                  |              |                      |                  |
| <i>No</i>                                     | 1.0         | ---                | ---              | 1.0         | ---                | ---              | ---          | ---                  | ---              |
| <i>Yes</i>                                    | 1.85        | 1.00 – 3.42        | 0.051            | <b>2.17</b> | <b>1.18 – 4.04</b> | <b>&lt;0.05</b>  | 0.24         | -2.77 – 3.25         | 0.875            |
| <b>Vitamin D Supplementation</b>              |             |                    |                  |             |                    |                  |              |                      |                  |
| <i>No</i>                                     | 1.0         | ---                | ---              | 1.0         | ---                | ---              | ---          | ---                  | ---              |
| <i>Yes</i>                                    | <b>0.15</b> | <b>0.07 – 0.28</b> | <b>&lt;0.001</b> | <b>0.11</b> | <b>0.06 – 0.22</b> | <b>&lt;0.001</b> | <b>-4.66</b> | <b>-7.01 – -2.30</b> | <b>&lt;0.001</b> |
| <b>Received COVID-19 Vaccine</b>              |             |                    |                  |             |                    |                  |              |                      |                  |
| <i>No</i>                                     | 1.0         | ---                | ---              | 1.0         | ---                | ---              | ---          | ---                  | ---              |
| <i>Yes</i>                                    | <b>0.58</b> | <b>0.35 – 0.95</b> | <b>&lt;0.05</b>  | <b>0.58</b> | <b>0.36 – 0.94</b> | <b>&lt;0.05</b>  | <b>-3.27</b> | <b>-5.56 – -0.99</b> | <b>&lt;0.05</b>  |
| <b>Exposed to Omicron or Delta Strain</b>     |             |                    |                  |             |                    |                  |              |                      |                  |
| <i>Delta</i>                                  | 1.0         | ---                | ---              | 1.0         | ---                | ---              | ---          | ---                  | ---              |
| <i>Omicron</i>                                | <b>1.79</b> | <b>1.09 – 2.94</b> | <b>&lt;0.05</b>  | <b>0.38</b> | <b>0.23 – 0.61</b> | <b>&lt;0.001</b> | <b>-2.56</b> | <b>-4.88 – -0.24</b> | <b>&lt;0.001</b> |
| <b>Previously Received Oral Polio Vaccine</b> |             |                    |                  |             |                    |                  |              |                      |                  |

|                                                       |             |                         |                  |             |                         |                  |             |                    |                  |
|-------------------------------------------------------|-------------|-------------------------|------------------|-------------|-------------------------|------------------|-------------|--------------------|------------------|
| Yes                                                   | 1.0         | ---                     | ---              | 1.0         | ---                     | ---              | ---         | ---                | ---              |
| No                                                    | <b>3.92</b> | <b>2.27 – 6.88</b>      | <b>&lt;0.001</b> | <b>4.06</b> | <b>2.35 – 7.17</b>      | <b>&lt;0.001</b> | <b>6.53</b> | <b>4.03 – 9.04</b> | <b>&lt;0.001</b> |
| <b>Vitamin D x Education</b>                          |             |                         |                  |             |                         |                  |             |                    |                  |
| (ref)                                                 | 1.0         | ---                     | ---              | 1.0         | ---                     | ---              | ---         | ---                | ---              |
| Vitamin D<br>(Yes)                                    | <b>0.1</b>  | <b>0.03 – 0.28</b>      | <b>&lt;0.001</b> | <b>0.07</b> | <b>0.02 – 0.21</b>      | <b>&lt;0.001</b> | --          | --                 | --               |
| Education<br>Completed<br>(Graduate<br>Degree)        | <b>0.38</b> | <b>0.15 – 0.91</b>      | <b>&lt;0.05</b>  | 0.48        | 0.20 – 1.12             | 0.093            | --          | --                 | --               |
| Education<br>Completed<br>(High<br>School or<br>Less) | 0.8         | 0.42 – 1.52             | 0.492            | 0.68        | 0.35 – 1.31             | 0.252            | --          | --                 | --               |
| Yes x<br>Graduate<br>Degree                           | <b>6.38</b> | <b>1.08 –<br/>38.50</b> | <b>&lt;0.05</b>  | <b>6.79</b> | <b>1.25 –<br/>38.83</b> | <b>&lt;0.05</b>  | --          | --                 | --               |
| Yes x High<br>School or<br>Less                       | 1.07        | 0.21 – 5.46             | 0.938            | 0.91        | 0.15 – 5.00             | 0.914            | --          | --                 | --               |
